# Supplementary figures and images for: Modulation of electrical properties in MoTe2by XeF2-mediated surface oxidation
Source: Royal Society of Chemistry journal article supplement (doi:10.1039/d1na00783a), 2022-01-01

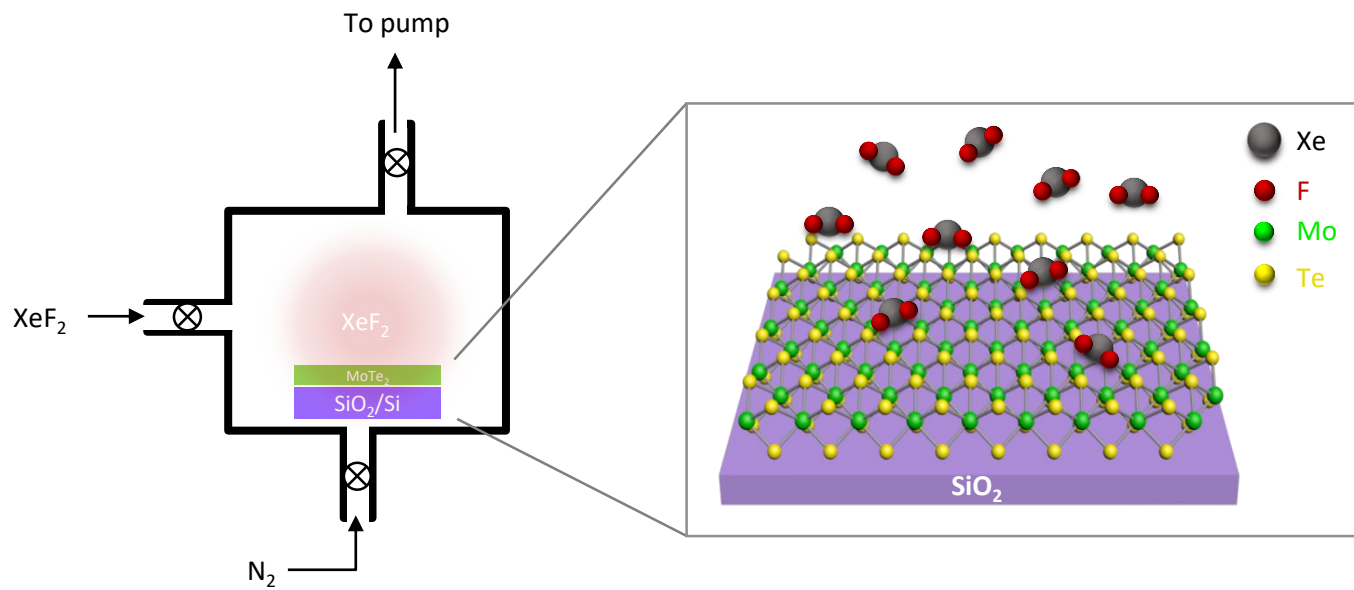

Supplement: d1na00783a3.pdf [file d1na00783a3.pdf]

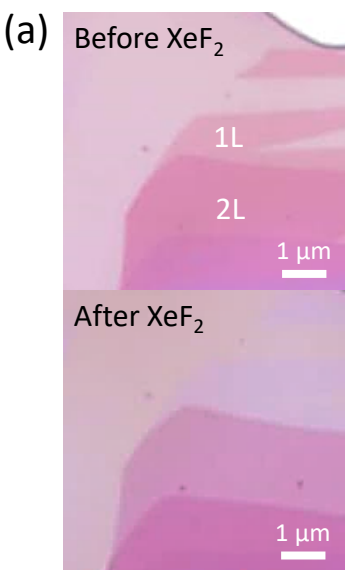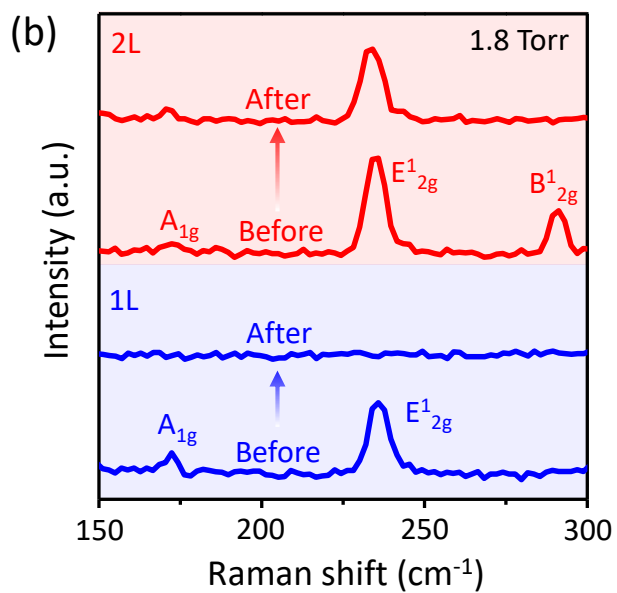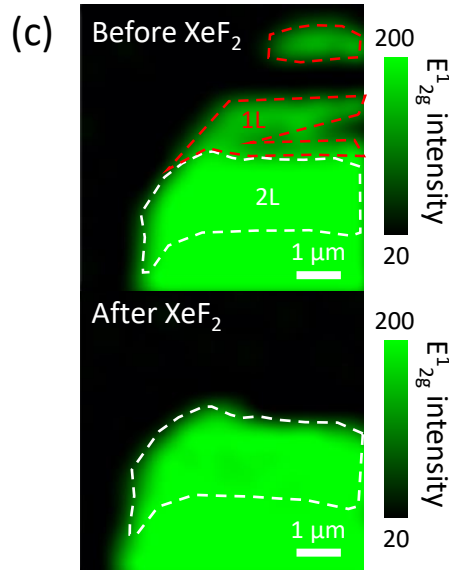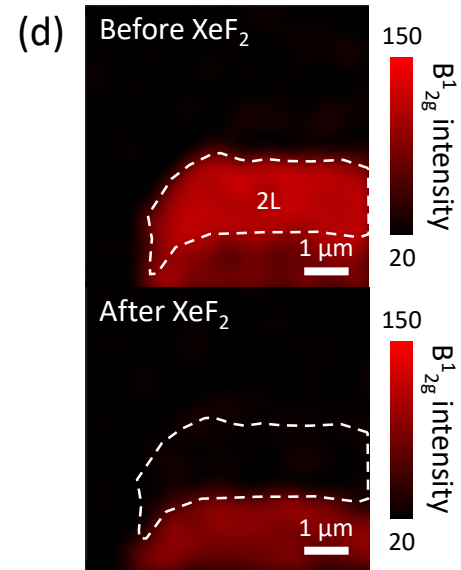

Supplement: d1na00783a4.pdf [file d1na00783a4.pdf]

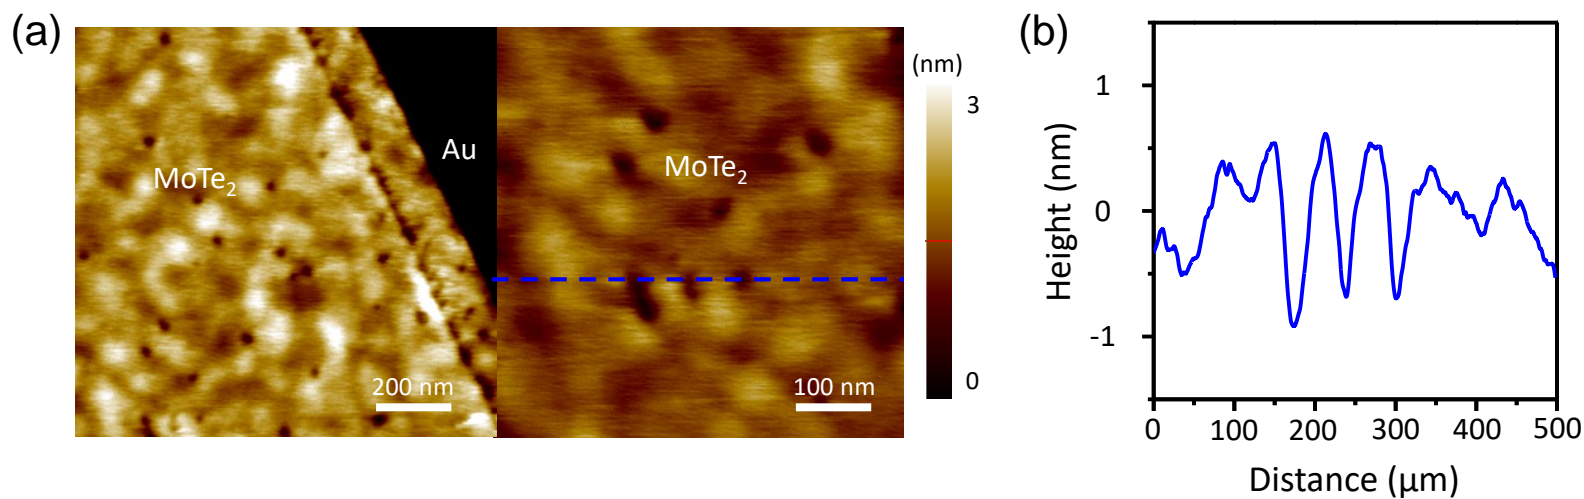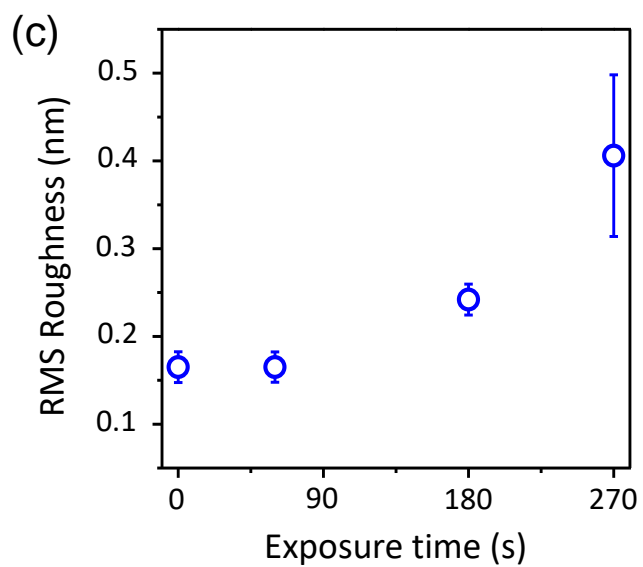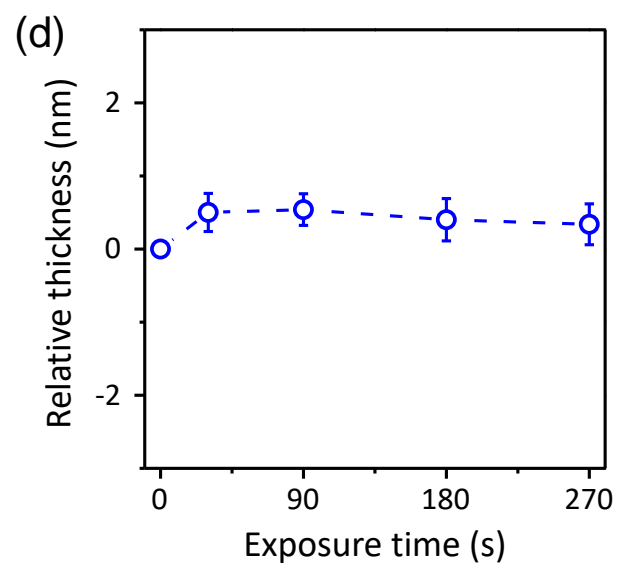

Supplement: d1na00783a5.pdf [file d1na00783a5.pdf]

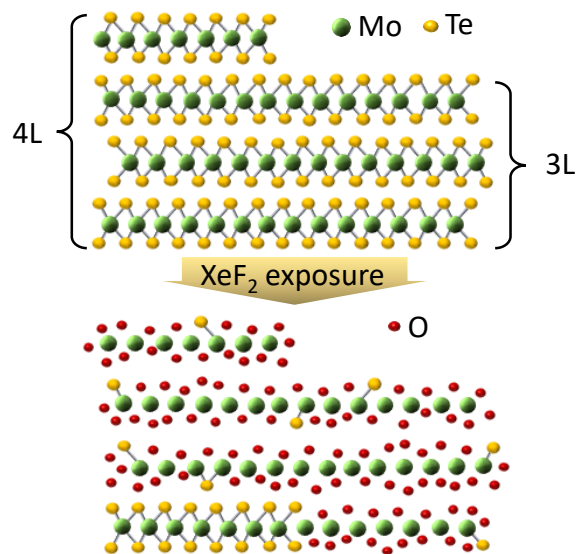

Supplement: d1na00783a6.pdf [file d1na00783a6.pdf]

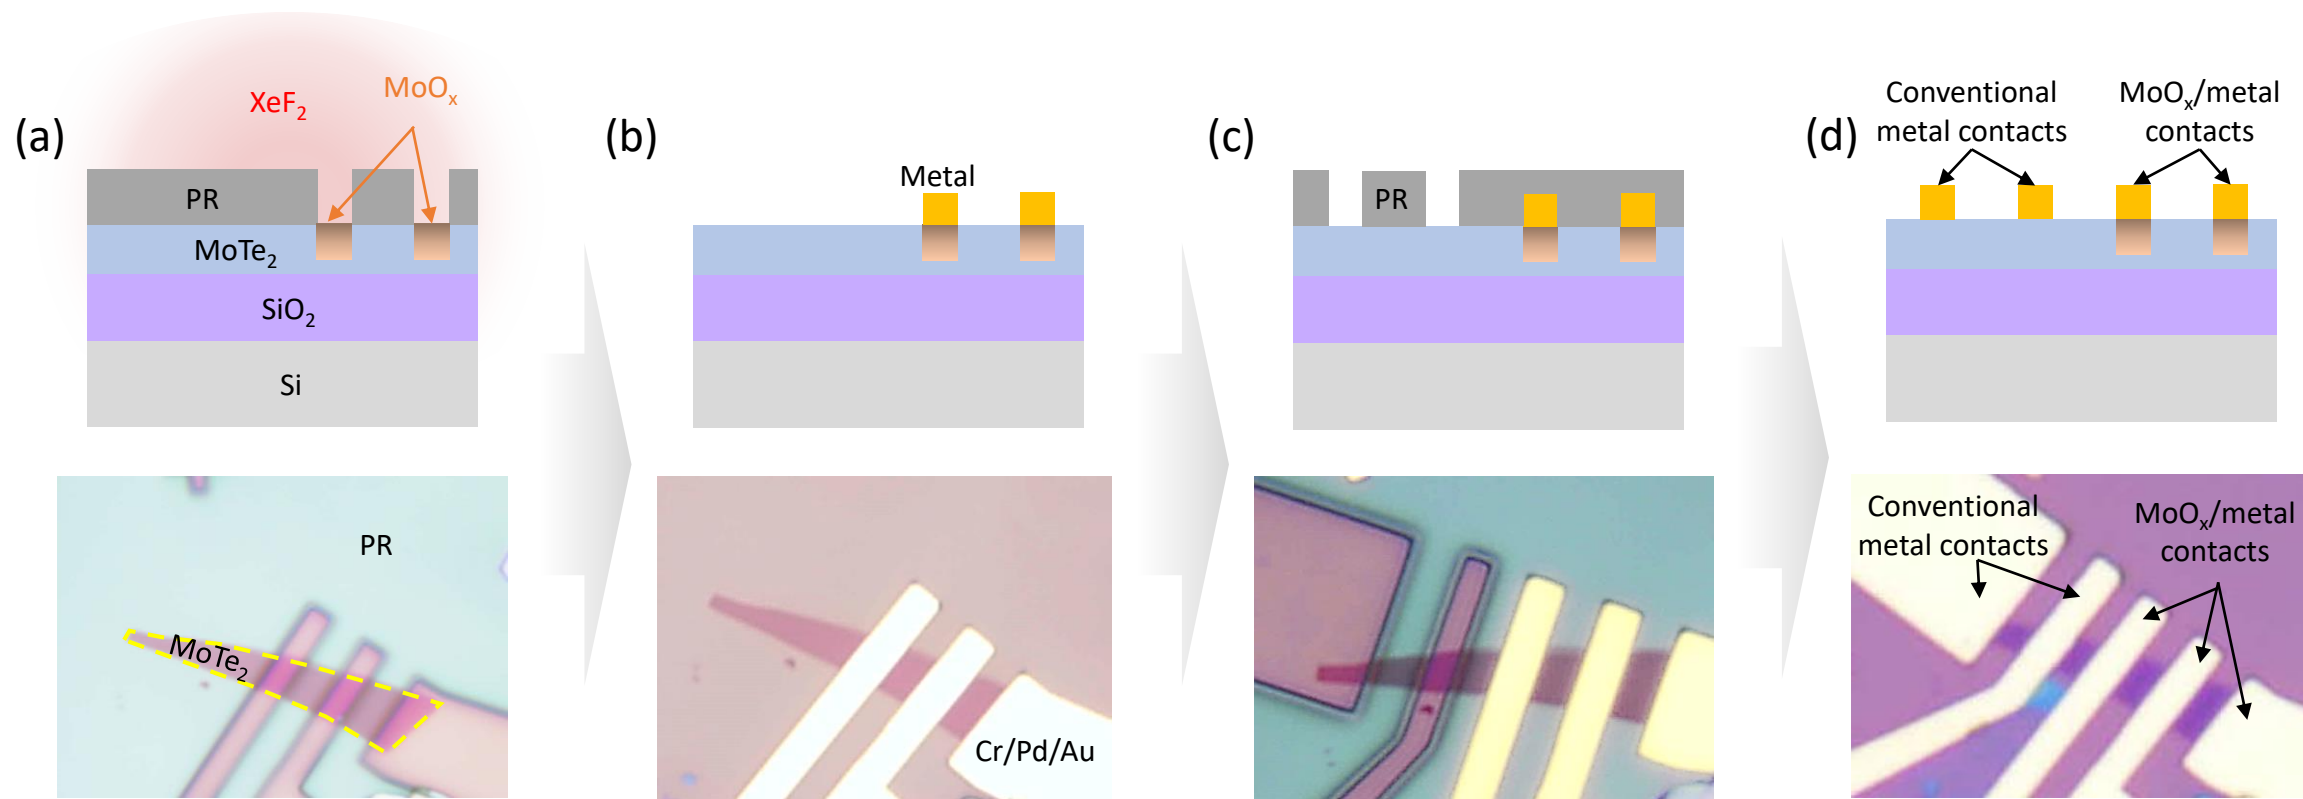

Supplement: d1na00783a7.pdf [file d1na00783a7.pdf]
